# Supplementary material
Source: PubMed Central journal article supplement (PMC10024926)
Supplement: NIHMS1878496-supplement-movie_captions.pdf [file NIHMS1878496-supplement-movie_captions.pdf]

## Other Supplementary Materials

**Movie S1. Overview of the morphology of an entire *Pleurodeles waltl* brain.** Optical coronal slices (1741 sections) of a cleared brain, stained with the nuclear marker TO-PRO-3, and imaged using light sheet microscopy along its anterior-posterior axis.

**Movie S2. Expression of marker genes in entire brains in virtual sections.** Optical coronal slices (~1800 sections per brain) of intact, cleared brains, stained using HCR or immunostaining, and imaged with light-sheet microscopy along their anterior-posterior axis. Slices of entire brains expressing *Etv1* (highly expressed in MP and DP), SATB1 (highly expressed in LP), *Sox6* (highly expressed in POE and VPa/p), *Slc17a6* (highly expressed in mOB, Vpp, and Amy), *Nr2f2* (highly expressed in Vpp/MeA/LA), *Penk* (highly expressed in mOB, Str, and MP, among others), and *Rorb* (highly expressed in LP, VPa, and VP) are shown sequentially.

**Movie S3. Expression of marker genes in entire brains in 3D.** 3D maximum intensity projections in intact, cleared brains, stained using HCR or immunostaining, and imaged with light-sheet microscopy, each rotated along their medial axis. 3D brains expressing *Etv1* (highly expressed in MP and DP), SATB1 (highly expressed in LP), *Sox6* (highly expressed in POE and VPa/p), *Slc17a6* (highly expressed in mOB, Vpp, and Amy), *Nr2f2* (highly expressed in Vpp/MeA/LA) and *Penk* (highly expressed in mOB, Str, and MP, among others) are shown sequentially.
